# Supplementary material
Source: HighWire-hosted journal article supplement (https://jnm.snmjournals.org/highwire/filestream/95546/field_highwire_adjunct_files/0/230979_Supplemental_Data.pdf)
Supplement: 230979_Supplemental_Data.pdf [file 230979_Supplemental_Data.pdf]

## Supplemental Tables

**Supplemental Table 1.** Comparison of regional volume measurements between healthy controls and patients with mild cognitive impairment (MCI).

| Region          | Raw Mean $\pm$ SD    |                      | Model Results* |          |                        |
|-----------------|----------------------|----------------------|----------------|----------|------------------------|
|                 | Control (N=17)       | MCI (N=14)           | B (SE)         | <i>P</i> | <i>d</i> (95% CI)      |
| Cerebellar CTX  | 97.11 $\pm$ 8.77     | 90.69 $\pm$ 10.81    | -6.42 (3.40)   | 0.07     | -0.72 (-1.45 to 0.01)  |
| Frontal CTX     | 150.28 $\pm$ 13.64   | 150.28 $\pm$ 13.64   | -1.43 (5.32)   | 0.79     | -0.10 (-81 to 0.60)    |
| Parietal CTX    | 95.48 $\pm$ 7.98     | 95.48 $\pm$ 7.98     | -0.27 (3.33)   | 0.93     | -0.03 (-0.74 to 0.68)  |
| Temporal CTX    | 83.07 $\pm$ 7.61     | 82.49 $\pm$ 7.12     | -1.90 (2.49)   | 0.46     | -0.23 (-0.94 to 0.48)  |
| Occipital CTX   | 40.45 $\pm$ 4.95     | 38.96 $\pm$ 4.90     | -1.49 (1.72)   | 0.39     | -0.31 (-1.03 to 0.39)  |
| Cingulate CTX   | 17.80 $\pm$ 2.32     | 17.09 $\pm$ 2.29     | -0.70 (0.81)   | 0.40     | -0.32 (-1.03 to 0.39)  |
| Thalamus        | 13.89 $\pm$ 1.00     | 12.99 $\pm$ 1.36     | -0.90 (0.41)   | 0.04     | -0.82 (-1.56 to -0.09) |
| Striatum        | 16.08 $\pm$ 1.20     | 16.23 $\pm$ 2.32     | 0.15 (0.63)    | 0.81     | 0.09 (-0.61 to 0.80)   |
| Hippocampus     | 7.89 $\pm$ 0.68      | 6.91 $\pm$ 0.95      | -0.98 (0.28)   | 0.001    | -1.29 (-2.06 to -0.51) |
| Basal Forebrain | 5.29 $\pm$ 0.31      | 5.12 $\pm$ 0.42      | -0.18 (0.13)   | 0.18     | -0.52 (-1.24 to 0.19)  |
| Total ICV       | 1470.69 $\pm$ 147.91 | 1514.91 $\pm$ 286.37 | -              | 0.98     | 0.01 (-0.70 to 0.72)   |

Note: Regional volumes are presented in cm<sup>3</sup>. B, unstandardized beta coefficient; CI, Confidence interval; Cohen's *d*=effect size; CTX, Cortex; ICV, intracranial volume; SD, standard deviation; SE, standard error. \*All regional volumes were analyzed using a single mixed effects regression model controlling for age. Total ICV was analyzed using an analysis of covariance controlling for age.

**Supplemental Table 2.** Comparison of regional  $^{18}\text{F}$ -ASEM total distribution volume ( $V_T$ ) values derived from partial volume corrected images from healthy controls and patients with mild cognitive impairment (MCI)

| Region          | Raw Mean $\pm$ SD |                  | Model results* |          |                      |
|-----------------|-------------------|------------------|----------------|----------|----------------------|
|                 | Control (N=17)    | MCI (N=14)       | B (SE)         | <i>P</i> | <i>d</i> (95% CI)    |
| Cerebellar CTX  | 21.25 $\pm$ 4.02  | 25.13 $\pm$ 4.06 | 3.88 (1.39)    | 0.009    | 1.00 (0.25 to 1.75)  |
| Frontal CTX     | 29.94 $\pm$ 5.21  | 34.49 $\pm$ 4.48 | 4.55 (1.69)    | 0.01     | 0.97 (0.22 to 1.72)  |
| Parietal CTX    | 32.76 $\pm$ 5.17  | 37.51 $\pm$ 5.44 | 4.75 (1.84)    | 0.01     | 0.93 (0.19 to 1.68)  |
| Temporal CTX    | 29.12 $\pm$ 5.13  | 33.34 $\pm$ 4.77 | 4.23 (1.72)    | 0.02     | 0.89 (0.15 to 1.63)  |
| Occipital CTX   | 29.49 $\pm$ 5.18  | 34.04 $\pm$ 4.25 | 4.55 (1.66)    | 0.01     | 0.99 (0.24 to 1.74)  |
| Cingulate CTX   | 27.17 $\pm$ 4.69  | 31.34 $\pm$ 4.79 | 4.17 (1.65)    | 0.01     | 0.91 (0.17 to 1.55)  |
| Thalamus        | 27.69 $\pm$ 5.00  | 31.05 $\pm$ 4.75 | 3.36 (1.70)    | 0.05     | 0.71 (-0.01 to 1.44) |
| Striatum        | 27.62 $\pm$ 6.18  | 32.95 $\pm$ 5.04 | 5.33 (1.98)    | 0.01     | 0.97 (0.22 to 1.72)  |
| Hippocampus     | 22.73 $\pm$ 4.60  | 25.81 $\pm$ 3.73 | 3.07 (1.47)    | 0.04     | 0.76 (0.02 to 1.49)  |
| Basal Forebrain | 24.62 $\pm$ 4.68  | 29.40 $\pm$ 4.77 | 4.78 (1.64)    | 0.007    | 1.05 (0.30 to 1.81)  |

B, unstandardized beta coefficient; Cohen's *d* =effect size; CI =confidence interval; SD=standard deviation; SE =standard error. \*All regional  $V_T$  values were analyzed using a single mixed effects regression model controlling for age. Data are presented as mean  $\pm$  standard deviation. CTX, Cortex.

**Supplemental Table 3.** Regional  $^{18}\text{F}$ -ASEM total distribution volume ( $V_T$ ) derived from images without partial volume correction (PVC) from healthy controls and patients with mild cognitive impairment (MCI).

| <b>Regions</b>  | <b>Control<br/>(N=17)</b> | <b>MCI<br/>(N=14)</b> |
|-----------------|---------------------------|-----------------------|
| Cerebellar CTX  | 16.86 $\pm$ 3.04          | 19.96 $\pm$ 3.38      |
| Frontal CTX     | 21.64 $\pm$ 3.84          | 24.97 $\pm$ 3.80      |
| Parietal CTX    | 23.11 $\pm$ 3.37          | 26.32 $\pm$ 4.35      |
| Temporal CTX    | 22.37 $\pm$ 3.88          | 25.17 $\pm$ 4.10      |
| Occipital CTX   | 21.70 $\pm$ 3.51          | 24.51 $\pm$ 3.33      |
| Cingulate CTX   | 21.66 $\pm$ 3.75          | 24.42 $\pm$ 4.20      |
| Thalamus        | 22.69 $\pm$ 4.65          | 26.53 $\pm$ 4.10      |
| Striatum        | 23.58 $\pm$ 4.43          | 27.57 $\pm$ 5.01      |
| Hippocampus     | 19.39 $\pm$ 3.29          | 22.03 $\pm$ 3.55      |
| Basal Forebrain | 22.03 $\pm$ 3.79          | 25.86 $\pm$ 3.85      |

Data are presented as mean  $\pm$  standard deviation. Linear mixed effects regression models controlling for age revealed no difference between the two cohorts overall (when region identifiers were not included in the model) or in any of the ten regions. The overall group difference in  $V_T$  derived from data without PVC was significant after additionally (in addition to age) controlling for race, sex, and *APOE*  $\epsilon$ 4 carrier status ( $F_{1,24}=9.06$ ,  $P=0.006$ ). CTX, Cortex.

**Supplemental Table 4.** Partial correlations ( $r$ ) between  $^{18}\text{F}$ -ASEM  $V_T$  and verbal memory function among 14 patients with mild cognitive impairment (MCI).

| <b>Region of Interest</b> | <b>CVLT Short<br/>Delay Free<br/>Recall</b> |                       | <b>CVLT Long<br/>Delay Free<br/>Recall</b> |                       |
|---------------------------|---------------------------------------------|-----------------------|--------------------------------------------|-----------------------|
|                           | <b><math>r</math></b>                       | <b><math>P</math></b> | <b><math>r</math></b>                      | <b><math>P</math></b> |
| Cerebellar CTX            | 0.14                                        | 0.65                  | 0.49                                       | 0.09                  |
| Frontal CTX               | -0.16                                       | 0.61                  | 0.21                                       | 0.48                  |
| Parietal CTX              | -0.30                                       | 0.33                  | 0.09                                       | 0.78                  |
| Temporal CTX              | -0.12                                       | 0.70                  | 0.21                                       | 0.48                  |
| Occipital CTX             | -0.03                                       | 0.93                  | 0.34                                       | 0.26                  |
| Cingulate CTX             | -0.12                                       | 0.70                  | 0.21                                       | 0.48                  |
| Thalamus                  | -0.11                                       | 0.73                  | 0.16                                       | 0.60                  |
| Striatum                  | -0.10                                       | 0.76                  | 0.07                                       | 0.81                  |
| Hippocampus               | 0.06                                        | 0.84                  | 0.34                                       | 0.26                  |
| Basal Forebrain           | -0.06                                       | 0.84                  | 0.23                                       | 0.44                  |

Regional  $^{18}\text{F}$ -ASEM  $V_T$  values were estimated using data from partial volume corrected images. There were no significant partial correlations, adjusted for age. CTX, Cortex; CVLT, California Verbal Learning Test.
